# Supplementary material for: CD44 promotes multi-drug resistance by protecting P-glycoprotein from FBXO21-mediated ubiquitination
Source: PubMed Central journal article supplement (PMC4694903; doi:10.18632/oncotarget.4763), 2015-07-03
Supplement: oncotarget-06-26308-s001.pdf [file oncotarget-06-26308-s001.pdf]

# CD44 promotes multi-drug resistance by protecting P-glycoprotein from FBXO21-mediated ubiquitination

## Supplementary Material

### *mdr1* gene expression

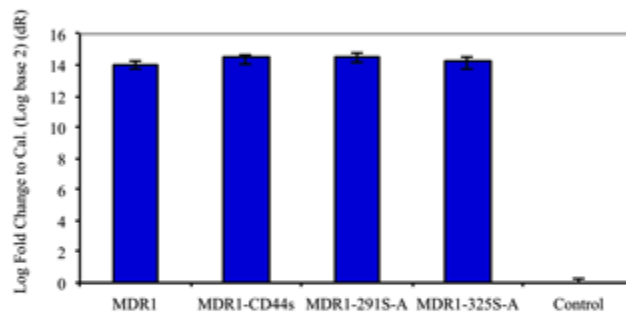

**Supplement Figure 1.** CD44 does not affect the *mdr1* gene expression level. Relative quantification of *mdr1* was performed in yeast strains transformed with *mdr1* alone driven by the TEF1 promoter, or *mdr1* co-transformed with *CD44* or the indicated phosphorylation mutants by Real Time RT-PCR according to the  $\Delta C_t$  comparative method and data are expressed as fold changes compared to the *mdr1* negative wild type yeast strain normalized to the TDH signal.

## Screening Results

| Gene Name | Gene ID | P values     |                |          |
|-----------|---------|--------------|----------------|----------|
|           |         | MCF-7/Pgp(+) | MCF-7/CD44s(+) | MCF-7    |
| MNAT1     | 4331    | 1.72E-05     | 1.12E-01       | 4.09E-01 |
| FBXO21    | 23014   | 2.10E-05     | 5.49E-01       | 4.05E-01 |
| TRIM56    | 81844   | 1.32E-04     | 7.82E-01       | 4.08E-01 |
| LONRF1    | 164832  | 1.38E-04     | 9.87E-01       | 6.62E-01 |
| TRIM62    | 55223   | 4.15E-04     | 4.82E-01       | 1.09E-01 |
| RNF115    | 27246   | 2.69E-03     | 1.26E-01       | 1.07E-01 |
| RNF25     | 64320   | 7.83E-03     | 1.87E-01       | 5.32E-01 |
| DTX2      | 113878  | 1.10E-02     | 8.20E-01       | 6.05E-01 |
| FBXL3     | 26224   | 1.24E-02     | 8.00E-01       | 1.93E-01 |
| CUL5      | 8065    | 1.61E-02     | 7.41E-01       | 8.97E-01 |

**Supplement Table 1:** RNAi screening identifies FBXO21 as a potential ligase candidate for P-gp. Parental MCF-7/(Pgp(-)/CD44(-), MCF-7/Pgp(+)/CD44(-), and MCF-7/Pgp(+)/CD44(+) cells were screened with an siRNA ubiquitin ligase library targeting 329 known and predicted ubiquitin ligases. Candidate genes displaying a direct effect on calcein accumulation in three independent primary screens are shown.

| <b>Cell type</b> | <b>Cell line</b> | <b>P-gp</b> | <b>CD44</b> |
|------------------|------------------|-------------|-------------|
| Breast cancer    | MCF-7            | Negative    | Negative    |
|                  | MCF-7/BC19       | Positive    | Negative    |
|                  | MCF-7/Adr        | Positive    | Positive    |
| Ovarian cancer   | SKA              | Negative    | Positive    |

**Supplement Table 2:** Cancer cell lines and their respective P-gp and CD44 expression.
